# Supplementary material for: The structure of the blue luminescent δ-phase of tris(8-hydroxyquinoline)aluminium(iii) (Alq3)
Source: Royal Society of Chemistry journal article supplement (doi:10.1039/b209164j), 2002-01-01

1. EXPERIMENTAL

X-ray powder diffraction data of Alq3 were collected at *T*= 295 K on beamline X3B1 of the Brookhaven National Synchrotron Light Source in transmission geometry with the samples sealed in 0.7 mm lithiumborate glass (Hilgenberg glass No. 50) capillaries (Fig. 1). X-rays of wavelength 1.15 Å were selected by a double Si(111) monochromator. Wavelengths and the zero point have been determined from eight well defined reflections of the NBS1976 flat plate alumina standard. The diffracted beam was analyzed with a Ge(111) crystal and detected with a Na(Tl)I scintillation counter with a pulse height discriminator in the counting chain. The incoming beam was monitored by an ion-chamber for normalization for the decay of the primary beam. In this parallel beam configuration, the resolution is determined by the analyzer crystal instead of by slits [Cox91]. Data were taken in steps of 0.005°2 with parameters given in Table 1. Although -scans did not show serious crystallite size effects, the samples were spun during measurement for better particle statistics.

Data reduction was performed using the GUFI [Din98] program. Indexing with ITO [Vis69] led to a primitive triclinic unit cell for Alq3 with lattice parameters given in Tab. 1. The number of formula units per unit cell could be determined to *Z*= 2 for from packing considerations and density measurements. *P-1* was selected as the most probable space group, which could later be confirmed by Rietveld refinements [Rie69]. The peak profiles and precise lattice parameters were determined by LeBail-type fits [LeB88] using the programs GSAS [Lar94] and FULLPROF [Car90, Car01]. The background was modeled manually using GUFI. The peak-profile was described by a pseudo-Voigt function in combination with a special function that accounts for the asymmetry due to axial divergence (Tho87; Fin94]. The sharpest peaks at low angle had a full width of half maximum (FWHM) of 0.015°2, significantly broader than the resolution of the diffractometer at that wavelength.

The crystal structure of Alq3 was solved from DASH [Dav98]. Structure solution package using the NSLS synchrotron data set as follows: The measured powder patterns were subjected to a Pawley refinement [Paw81] in space group *P-1* in order to extract correlated integrated intensities from the pattern. Good fit to the data were obtained. An internal coordinate description of the Alq3 moiety was constructed using bond lengths, angles and torsion angle from corresponding crystal structures. Six torsion angles between the three hydroxyquinoline groups (3* C-C-O-Al; 3* C-O-Al-O) could not be assigned precise values in advance and were flagged as variables (allowed range of ±20° around the value for an idealized molecule) for refinement in the simulated annealing procedure. The position, orientation and conformation of the Alq3 molecule in the refined unit cell were postulated and the level of agreement between the trial structure and the experimental diffraction data quantified by: , where *Ih* and*Ik* are Lorentz-polarisation corrected, extracted integrated intensities from the Pawley refinementof the diffraction data, *Vhk* is the covariance matrix from the Pawley refinement, *c* is a scale factor, and |*Fh*| and |*Fk*| are the structure factor magnitudes calculated from the trial structure. The trial structure was subjected to a global optimization [Dav98] in which the six torsion angles within the Alq3 molecule were the only internal degrees of freedom and the external degrees of freedom consisted of the fractional coordinates describing the position of and four quaternions [Lea96] describing the orientation of the Alq3 molecule. The structure giving the best fit to the data was verified by Rietveld refinement of the fractional co-ordinates obtained at the end of the simulated annealing run.

Rietveld refinements were performed on Alq3 using the program package GSAS [Rie69, Lar94] (Fig. 1). The background for was modeled manually using GUFI [Din98]. The peak-profile was described by a pseudo-Voigt function, in combination with a special function that accounts for the asymmetry due to axial divergence [Tho87; Fin94]. Soft constraints for bond lengths, angles and planarity of the functional groups (q) necessary in order to to stabilize the refinement. The best Rietveld refinement using weak soft constraints was achieved with agreement factors (R-values) listed in Table 1. the coordinates are given in Tab.2, and a selection of intra- and inter-molecular distances and angles is given in Table 3.

##### References

[Car90] Carvajal, J. R. (1990). Abstracts of the Satellite Meeting on Powder Diffraction of the XV Congress of the IUCr, Toulouse, France, 127.

[Car01] Carvajal, J. R. (2001). PROGRAM FullProf.2k, Version 1.9c - May2001-LLB JRC; available at ftp://charybde.saclay.cea.fr/pub/divers/fullprof.2k/.

[Cox91] Cox, D.E (1991). Handbook of Synchrotron Radiation, Vol.3, Ch. 5 Powder Diffraction (eds. Brown, G. and Moncton, D.E.), Elsevier, Amsterdam.

[Dav98] David, W. I. F., Shankland, K. & Shankland, N. (1998). Chem. Commun. 931-932.

[Din98] Dinnebier, R.E. & Finger, L. (1998). Z. Krist. Suppl. 15, 148; GUFI 5.0 available at http://www.mpi-stuttgart.mpg.de/xray/:

[Fin94] Finger, L. W., Cox, D. E. & Jephcoat, A. P. (1994). J. Appl. Cryst. 27, 892-900.

[Lar94] Larson, A. C. & Von Dreele, R. B. (1994). GSAS – General Structure Analysis System, Los Alamos National Laboratory Report LAUR 86-748; available by anonymous FTP from mist.lansce.lanl.gov.

[Lea96] Leach, A. R. (1996). Molecular Modelling Principles and Applications, Addison Wesley Longman Limited, page 384.

[LeB88] Le Bail, A., Duroy, H. & Fourquet, J.L. (1988). Mat. Res. Bull. **23**, 447-452.

[Paw81] Pawley, G. S. (1981). J. Appl. Cryst. 14, 357-361.

[Rie69] Rietveld, H.M (1969). J. Appl. Cryst. **2**, 65-71.

[Tho87] Thompson, P., Cox, D. E. & Hastings, J. B. (1987). J. Appl. Cryst. **20**, 79-83.

[Vis69] Visser, J.W. (1969). J. Appl. Cryst. **2**, 89-95.

## Table: positional parameters and temperature factors

| **Name** | **X** | **Y** | **Z** | **Ui [Å2*100]** |
| --- | --- | --- | --- | --- |
| **Al1** | 0.6865(6) | 0.3116(5) | 0.774(1) | 4.4(4) |
| **N2** | 0.5863(7) | 0.1964(7) | 0.545(2) | 1.9(1) |
| **C3** | 0.6088(7) | 0.1556(8) | 0.370(2) | 1.9(1) |
| **C4** | 0.5217(9) | 0.0790(9) | 0.242(1) | 1.9(1) |
| **C5** | 0.4110(9) | 0.0416(7) | 0.295(2) | 1.9(1) |
| **C6** | 0.3879(6) | 0.0828(7) | 0.479(1) | 1.9(1) |
| **C7** | 0.2770(7) | 0.0461(7) | 0.546(2) | 1.9(1) |
| **C8** | 0.2598(7) | 0.0918(8) | 0.732(2) | 1.9(1) |
| **C9** | 0.3520(8) | 0.1728(9) | 0.853(2) | 1.9(1) |
| **C10** | 0.4617(7) | 0.2064(6) | 0.788(1) | 1.9(1) |
| **C11** | 0.4802(6) | 0.1615(6) | 0.603(1) | 1.9(1) |
| **O12** | 0.5513(7) | 0.2799(7) | 0.893(1) | 1.9(1) |
| **N13** | 0.8224(6) | 0.3310(7) | 0.592(2) | 1.9(1) |
| **C14** | 0.8662(9) | 0.3888(8) | 0.422(2) | 1.9(1) |
| **C15** | 0.958(1) | 0.3824(7) | 0.334(2) | 1.9(1) |
| **C16** | 1.0035(7) | 0.3156(8) | 0.422(2) | 1.9(1) |
| **C17** | 0.9585(7) | 0.2553(7) | 0.600(1) | 1.9(1) |
| **C18** | 1.0032(8) | 0.1877(8) | 0.697(2) | 1.9(1) |
| **C19** | 0.9561(9) | 0.1288(8) | 0.878(2) | 1.9(1) |
| **C20** | 0.8629(9) | 0.1384(7) | 0.965(2) | 1.9(1) |
| **C21** | 0.8207(7) | 0.2079(7) | 0.866(1) | 1.9(1) |
| **C22** | 0.8679(6) | 0.2668(6) | 0.685(1) | 1.9(1) |
| **O23** | 0.7366(8) | 0.2234(7) | 0.938(1) | 1.9(1) |
| **N24** | 0.6499(7) | 0.4164(6) | 0.553(2) | 1.9(1) |
| **C25** | 0.5883(8) | 0.4033(7) | 0.357(2) | 1.9(1) |
| **C26** | 0.5713(8) | 0.4857(9) | 0.255(1) | 1.9(1) |
| **C27** | 0.6189(7) | 0.5820(8) | 0.353(2) | 1.9(1) |
| **C28** | 0.6800(7) | 0.5950(6) | 0.560(1) | 1.9(1) |
| **C29** | 0.7286(8) | 0.6917(7) | 0.673(2) | 1.9(1) |
| **C30** | 0.7908(8) | 0.7017(7) | 0.877(2) | 1.9(1) |
| **C31** | 0.8053(7) | 0.6147(8) | 0.973(2) | 1.9(1) |
| **C32** | 0.7559(7) | 0.5181(6) | 0.859(1) | 1.9(1) |
| **C33** | 0.6936(6) | 0.5082(6) | 0.655(1) | 1.9(1) |
| **O34** | 0.7639(7) | 0.4326(6) | 0.936(1) | 1.9(1) |

**Results with the assumtion of the meridional isomer:**

Table 1: Crystallographic data for -Alq3. R-p, R-wp and R-F2 refer to the Rietveld criteria of fit for profile and weighted profile respectively, defined in (Langford & Louer, 1996)

| Formula | Al(C9H6NO)3 |
| --- | --- |
| Temperature [K] | 295 |
| Formula weight [g/mol] | 918.88 |
| Space group | P-1 |
| Z | 2 |
| a [Å] | 13.2412(1) |
| b [Å] | 14.4245(1) |
| c [Å] | 6.17684(4) |
|  [°] | 88.5553(7) |
|  [°] | 95.9230(6) |
|  [°] | 113.9332(5) |
| V [Å3] | 1072.38(2) |
| -calc [g/cm3] | 1.423 |
| 2 range [°] | 4-35.7 |
| Step size [°2] | 0.005 |
| Wavelength [Å] | 1.14982(2) |
|  [1/cm] | 2.48 |
| Capillary diamater | 0.7 |
| R-p [%] | 7.3 |
| R-wp [%] | 9.4 |
| R-F2 [%] | 19.4 |
| No of reflections | 357 |

Table2: Positional parameters and temperature factors for -Alq3 at ambient conditions for the assumption of the meridional isomer

| Name | X | Y | Z | Ui [Å2*100] |
| --- | --- | --- | --- | --- |
| AL1 | 0.1829(9) | 0.3033(8) | 0.806(2) | 2.4(5) |
| N2 | 0.149(1) | 0.4182(9) | 0.553(3) | 1.3(2) |
| C3 | 0.089(1) | 0.410(1) | 0.348(3) | 1.3(2) |
| C4 | 0.071(1) | 0.491(1) | 0.253(2) | 1.3(2) |
| C5 | 0.121(1) | 0.583(1) | 0.364(3) | 1.3(2) |
| C6 | 0.181(1) | 0.5965(9) | 0.571(2) | 1.3(2) |
| C7 | 0.227(1) | 0.694(1) | 0.690(3) | 1.3(2) |
| C8 | 0.287(1) | 0.705(1) | 0.896(3) | 1.3(2) |
| C9 | 0.305(1) | 0.619(1) | 0.994(2) | 1.3(2) |
| C10 | 0.257(1) | 0.5168(9) | 0.879(2) | 1.3(2) |
| C11 | 0.1926(9) | 0.5092(9) | 0.666(2) | 1.3(2) |
| O12 | 0.266(1) | 0.4267(9) | 0.955(2) | 1.3(2) |
| N13 | 0.091(1) | 0.198(1) | 0.558(2) | 1.3(2) |
| C14 | 0.113(1) | 0.160(1) | 0.377(3) | 1.3(2) |
| C15 | 0.033(1) | 0.086(1) | 0.245(2) | 1.3(2) |
| C16 | -0.079(1) | 0.046(1) | 0.291(2) | 1.3(2) |
| C17 | -0.105(1) | 0.084(1) | 0.471(2) | 1.3(2) |
| C18 | -0.218(1) | 0.047(1) | 0.527(3) | 1.3(2) |
| C19 | -0.237(1) | 0.093(1) | 0.702(3) | 1.3(2) |
| C20 | -0.148(1) | 0.171(1) | 0.832(2) | 1.3(2) |
| C21 | -0.037(1) | 0.204(1) | 0.783(2) | 1.3(2) |
| C22 | -0.0152(9) | 0.1628(9) | 0.605(2) | 1.3(2) |
| O23 | 0.046(1) | 0.274(1) | 0.899(2) | 1.3(2) |
| N24 | 0.291(1) | 0.2304(1) | 0.869(2) | 1.3(2) |
| C25 | 0.300(1) | 0.157(1) | 0.990(3) | 1.3(2) |
| C26 | 0.388(2) | 0.123(1) | 0.971(2) | 1.3(2) |
| C27 | 0.465(1) | 0.152(1) | 0.817(3) | 1.3(2) |
| C28 | 0.451(1) | 0.227(1) | 0.682(2) | 1.3(2) |
| C29 | 0.519(1) | 0.272(1) | 0.519(3) | 1.3(2) |
| C30 | 0.499(1) | 0.344(1) | 0.370(2) | 1.3(2) |
| C31 | 0.421(1) | 0.382(1) | 0.390(2) | 1.3(2) |
| C32 | 0.352(1) | 0.330(1) | 0.549(2) | 1.3(2) |
| C33 | 0.367(1) | 0.2624(9) | 0.706(2) | 1.3(2) |
| O34 | 0.281(1) | 0.358(1) | 0.595(2) | 1.3(2) |

**Table 3: Bondlengths [Å] (mer-isomer)**

| Bond | Distance |
| --- | --- |
| AL1_N13 | 2.09(1) |
| AL1_N2 | 2.39(2) |
| AL1_N24 | 2.10(1) |
| AL1_O12 | 1.87(1) |
| AL1_O23 | 1.84(1) |
| AL1_O34 | 1.87(1) |
| C10_C11 | 1.47(1) |
| C10_O12 | 1.42(1) |
| C11_N2 | 1.38(1) |
| C14_C15 | 1.37(1) |
| C14_N13 | 1.37(1) |
| C15_C16 | 1.42(1) |
| C16_C17 | 1.38(1) |
| C17_C18 | 1.45(1) |
| C17_C22 | 1.46(1) |
| C18_C19 | 1.38(1) |
| C19_C20 | 1.45(1) |
| C20_C21 | 1.41(1) |
| C21_C22 | 1.38(1) |
| C21_O23 | 1.31(1) |
| C22_N13 | 1.34(1) |
| C25_C26 | 1.45(1) |
| C25_N24 | 1.32(1) |
| C26_C27 | 1.40(1) |
| C27_C28 | 1.41(1) |
| C28_C29 | 1.39(1) |
| C28_C33 | 1.42(1) |
| C29_C30 | 1.46(1) |
| C3_C4 | 1.39(1) |
| C3_N2 | 1.40(1) |
| C30_C31 | 1.37(1) |
| C31_C32 | 1.40(1) |
| C32_C33 | 1.42(1) |
| C32_O34 | 1.22(1) |
| C33_N24 | 1.42(1) |
| C33_O34 | 2.17(1) |
| C4_C5 | 1.38(1) |
| C5_C6 | 1.40(1) |
| C6_C11 | 1.44(1) |
| C6_C7 | 1.46(1) |
| C7_C8 | 1.41(1) |
| C8_C9 | 1.47(1) |
| C9_C10 | 1.51(1) |

## Table 4: Angles [°] (mer-isomer)

| Angle | Degrees |
| --- | --- |
| O12_AL1_N13 | 161.2(9) |
| O12_AL1_O23 | 100.2(8) |
| O12_AL1_N24 | 100.1(8) |
| O12_AL1_O34 | 84.5(8) |
| N13_AL1_O23 | 83.5(8) |
| N13_AL1_N24 | 91.1(7) |
| N13_AL1_O34 | 83.1(7) |
| O23_AL1_N24 | 130.1(8) |
| O23_AL1_O34 | 148.9(9) |
| N24_AL1_O34 | 78.1(7) |
| C3_N2_C11 | 119.7(9) |
| N2_C3_C4 | 122(1) |
| C3_C4_C5 | 116.8(9) |
| C4_C5_C6 | 124.1(9) |
| C5_C6_C7 | 123(1) |
| C5_C6_C11 | 116.9(9) |
| C7_C6_C11 | 120.3(8) |
| C6_C7_C8 | 121.5(9) |
| C7_C8_C9 | 120(1) |
| C8_C9_C10 | 120.3(9) |
| C9_C10_C11 | 117.2(8) |
| C9_C10_O12 | 126.5(9) |
| C11_C10_O12 | 116.3(9) |
| N2_C11_C6 | 120.0(8) |
| N2_C11_C10 | 119.0(9) |
| C6_C11_C10 | 120.9(9) |
| AL1_O12_C10 | 120(1) |
| AL1_N13_C14 | 136(1) |
| AL1_N13_C22 | 105.6(9) |
| C14_N13_C22 | 118.1(9) |
| N13_C14_C15 | 123(1) |
| C14_C15_C16 | 120(1) |
| C15_C16_C17 | 118.2(9) |
| C16_C17_C18 | 121.3(9) |
| C16_C17_C22 | 118.5(8) |
| C18_C17_C22 | 120.2(8) |
| C17_C18_C19 | 117.5(9) |
| C18_C19_C20 | 121.7(9) |
| C19_C20_C21 | 120.8(9) |
| C20_C21_C22 | 119.1(8) |
| C20_C21_O23 | 123(1) |
| C22_C21_O23 | 118.2(9) |
| N13_C22_C17 | 121.9(8) |
| N13_C22_C21 | 117.6(9) |
| C17_C22_C21 | 120.5(8) |
| AL1_O23_C21 | 115(1) |
| AL1_N24_C25 | 139(1) |
| AL1_N24_C33 | 107(1) |
| C25_N24_C33 | 113.7(9) |
| N24_C25_C26 | 121(1) |
| C25_C26_C27 | 127(1) |
| C26_C27_C28 | 110.4(9) |
| C27_C28_C29 | 122(1) |
| C27_C28_C33 | 121.7(8) |
| C29_C28_C33 | 115.9(9) |
| C28_C29_C30 | 121.7(9) |
| C29_C30_C31 | 124(1) |
| C30_C31_C32 | 110.9(9) |
| C31_C32_C33 | 128.1(8) |
| C31_C32_O34 | 119(1) |
| C33_C32_O34 | 111.0(9) |
| N24_C33_C28 | 125.1(8) |
| N24_C33_C32 | 116.9(9) |
| C28_C33_C32 | 117.9(8) |


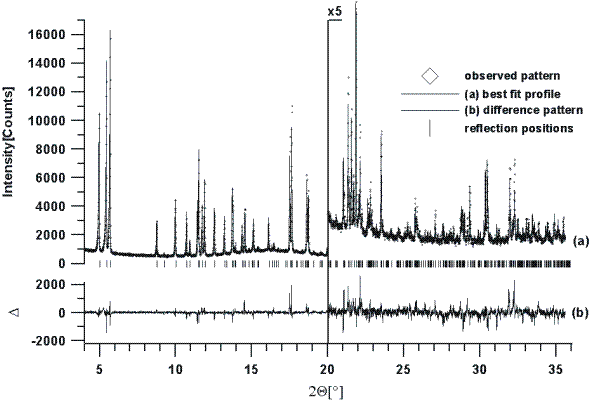


Scattered X-ray intensity for -Alq3 at ambient conditions as a function of diffraction angle 2. Shown are the observed patterns (diamonds), the best Rietveld-fit profiles under the assumption of a meridional isomer (line) and the enlarged difference curves between observed and calculated profiles in an additional window below. The high angle part is enlarged by a factor of 5, starting at 20°. The wavelength was  = 1.15 Å.

Table 1: Crystallographic data for -Alq3. R-p, R-wp, and R-F2 refer to the Rietveld criteria of fit for profile and weighted profile respectively, defined in Ref [Lan96].

| Formula | Al(C9H6NO)3 |
| --- | --- |
| Temperature [K] | 295 |
| Formula weight [g/mol] | 918.88 |
| Space group | P-1 |
| Z | 2 |
| a [Å] | 13.2415(1) |
| b [Å] | 14.4253(1) |
| c [Å] | 6.17727(5) |
|  [°] | 88.5542(8) |
|  [°] | 95.9258(7) |
|  [°] | 113.9360(6) |
| V [Å3] | 1072.52(2) |
| -calc [g/cm3] | 1.423 |
| 2 range [°] | 4-35.7 |
| Step size [°2] | 0.005 |
| Wavelength [Å] | 1.14982(2) |
|  [1/cm] | 2.48 |
| Capillary diamater | 0.7 |
| R-p [%] | 5.0 |
| R-wp [%] | 6.5 |
| R-F2 [%] | 10.5 |
| reduced 2 [%] | 1.6 |
| No of reflections | 337 |
| No. of variables | 115 |

[Lan96] Langford, I. and Louer, D. (1996) Rep. Prog. Physics **59**, 131-234.

**Table: Bondlengths [Å]**

| **Bond** | Distance |
| --- | --- |
| Al1_N2 | 2.112(9) |
| Al1_N13 | 2.14(1) |
| Al1_N24 | 2.18(1) |
| Al1_O12 | 1.883(7) |
| Al1_O23 | 1.890(7) |
| Al1_O34 | 1.877(7) |
| N2_C11 | 1.370(7) |
| N2_C3 | 1.362(8) |
| N13_C14 | 1.351(8) |
| N13_C22 | 1.381(7) |
| N24_C25 | 1.362(7) |
| N24_C33 | 1.353(7) |
| O12_C10 | 1.343(7) |
| O23_C21 | 1.339(7) |
| O34_C32 | 1.351(7) |
| C3_C4 | 1.411(8) |
| C4_C5 | 1.413(7) |
| C5_C6 | 1.407(8) |
| C6_C11 | 1.450(7) |
| C6_C7 | 1.446(7) |
| C7_C8 | 1.423(8) |
| C8_C9 | 1.455(8) |
| C9_C10 | 1.430(7) |
| C10_C11 | 1.418(7) |
| C14_C15 | 1.418(8) |
| C15_C16 | 1.402(8) |
| C16_C17 | 1.410(8) |
| C17_C18 | 1.425(8) |
| C17_C22 | 1.429(7) |
| C18_C19 | 1.425(8) |
| C19_C20 | 1.451(8) |
| C20_C21 | 1.430(7) |
| C21_C22 | 1.424(7) |
| C25_C26 | 1.418(8) |
| C26_C27 | 1.396(8) |
| C27_C28 | 1.416(7) |
| C28_C29 | 1.440(8) |
| C28_C33 | 1.438(7) |
| C29_C30 | 1.408(8) |
| C30_C31 | 1.449(8) |
| C31_C32 | 1.442(7) |
| C32_C33 | 1.409(7) |

**Table: Angles [°]**

| **Angle** | **Degree** |
| --- | --- |
| Al1_N13_C14 | 134.2(7) |
| Al1_N13_C22 | 105.2(6) |
| Al1_N2_C11 | 106.6(6) |
| Al1_N2_C3 | 133.0(7) |
| Al1_N24_C25 | 132.8(8) |
| Al1_N24_C33 | 106.9(6) |
| Al1_O12_C10 | 115.8(7) |
| Al1_O23_C21 | 116.5(7) |
| Al1_O34_C32 | 118.3(7) |
| C3_C4_C5 | 121.5(7) |
| C3_N2_C11 | 120.5(6) |
| C4_C5_C6 | 118.7(6) |
| C5_C6_C11 | 117.7(5) |
| C5_C6_C7 | 121.6(6) |
| C6_C11_C10 | 120.1(5) |
| C6_C7_C8 | 118.5(6) |
| C7_C6_C11 | 120.7(6) |
| C7_C8_C9 | 120.7(6) |
| C8_C9_C10 | 120.2(6) |
| C9_C10_C11 | 119.8(5) |
| C9_C10_O12 | 123.8(6) |
| C11_C10_O12 | 116.4(6) |
| C14_C15_C16 | 120.3(7) |
| C14_N13_C22 | 120.6(6) |
| C15_C16_C17 | 119.8(6) |
| C16_C17_C18 | 121.8(6) |
| C16_C17_C22 | 117.6(6) |
| C17_C18_C19 | 120.1(6) |
| C17_C22_C21 | 119.3(6) |
| C18_C17_C22 | 120.6(6) |
| C18_C19_C20 | 120.0(7) |
| C19_C20_C21 | 118.8(6) |
| C20_C21_C22 | 121.2(6) |
| C20_C21_O23 | 123.0(6) |
| C22_C21_O23 | 115.8(6) |
| C25_C26_C27 | 120.3(6) |
| C25_N24_C33 | 120.1(6) |
| C26_C27_C28 | 119.0(6) |
| C27_C28_C29 | 121.6(7) |
| C27_C28_C33 | 117.8(6) |
| C28_C29_C30 | 119.8(6) |
| C28_C33_C32 | 119.7(6) |
| C29_C28_C33 | 120.6(6) |
| C29_C30_C31 | 120.0(7) |
| C30_C31_C32 | 119.8(6) |
| C31_C32_C33 | 120.2(6) |
| C31_C32_O34 | 124.2(6) |
| C33_C32_O34 | 115.7(6) |
| N2_Al1_N13 | 86.9(4) |
| N2_Al1_N24 | 86.4(4) |
| N2_Al1_O12 | 83.2(5) |
| N2_Al1_O23 | 92.8(5) |
| N2_Al1_O34 | 167.0(6) |
| N2_C11_C10 | 118.0(6) |
| N2_C11_C6 | 121.8(5) |
| N2_C3_C4 | 119.8(6) |
| N13_Al1_N24 | 87.8(4) |
| N13_Al1_O23 | 83.1(5) |
| N13_Al1_O34 | 94.2(5) |
| N13_C14_C15 | 120.2(7) |
| N13_C22_C17 | 121.5(5) |
| N13_C22_C21 | 119.1(6) |
| N24_Al1_O34 | 80.7(5) |
| N24_C25_C26 | 120.7(7) |
| N24_C33_C28 | 122.1(5) |
| N24_C33_C32 | 118.2(6) |
| O12_Al1_N13 | 170.0(6) |
| O12_Al1_N24 | 89.9(5) |
| O12_Al1_O23 | 99.1(6) |
| O12_Al1_O34 | 95.1(6) |
| O23_Al1_N24 | 170.9(6) |
| O23_Al1_O34 | 100.2(6) |

**Torsion angles:**

The hydroxyquinoline ligands are approximately planar. The planes have been defined by (see file with labeling of the atoms):

ligand 1: N2, C4, C8

ligand 2: N13, C15, C19

ligand 3: N24, C26, C30

the torsion angles are:

ligand1 vs ligand 2: 86°

ligand1 vs ligand 3: 78°

ligand2 vs ligand 3: 88°

The planes defined by the O and N atoms respectively are parallel (angle < 2°) thus the following angles are similar for the plane defined by the N-atoms:

Angles of the O-plane with the 3 ligands:

ligand 1: 55°

ligand 2: 57°

ligand 3: 58°


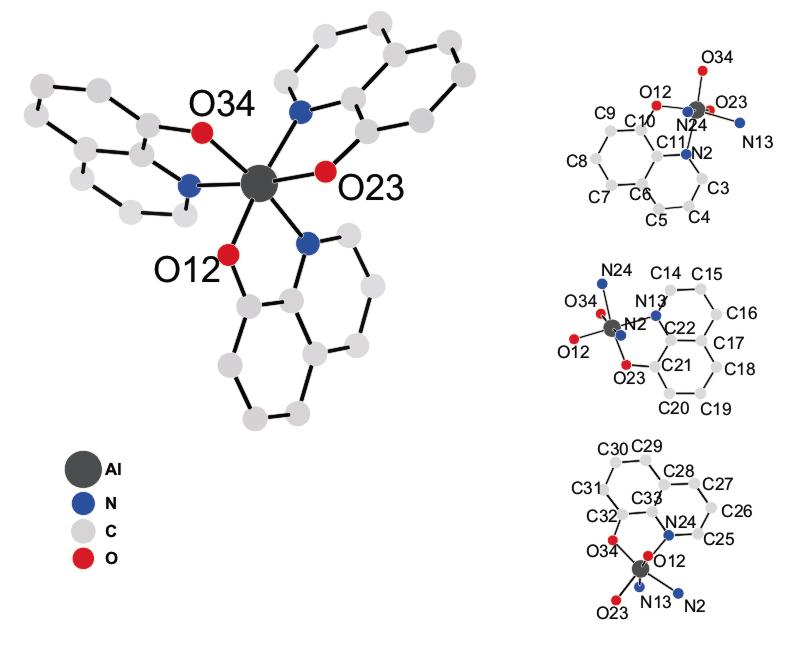

Supplement: b209164j.doc [file b209164j.doc]
